# Supplementary material for: Androgen receptor overexpression in prostate cancer in type 2 diabetes
Source: PubMed Central journal article supplement — Mol Metab. 2017 Dec 5;8:158–66. doi: 10.1016/j.molmet.2017.11.013 (PMC5985051; doi:10.1016/j.molmet.2017.11.013), 2017-12-05
Supplement: mmc2.pdf [file mmc2.pdf]

**Supplementary table 1.** Staging of the included patients

|                       | Patients with diabetes | Patients without diabetes | p   |
|-----------------------|------------------------|---------------------------|-----|
| pT 2a                 | 12                     | 13                        | 0.1 |
| pT 2b                 | 0                      | 0                         |     |
| pT 2c                 | 41                     | 45                        |     |
| pT 3a                 | 11                     | 13                        |     |
| pT 3b                 | 3                      | 7                         |     |
| pT 3c                 | 1                      | 0                         |     |
| pT 4                  | 4                      | 0                         |     |
| Lymph node metastasis | 2/78                   | 6/73                      | 0.1 |
| Distant metastasis    | 0/78                   | 0/73                      | 1.0 |

**Supplementary table 2.** Antidiabetic therapy in patients with diabetes

| Drug class                  |      |
|-----------------------------|------|
| Insulin                     | 15 % |
| Metformin                   | 55 % |
| Sulfonylurea / repaglinid   | 17 % |
| DPP4 inhibitor              | 7 %  |
| Alpha-glucosidase inhibitor | 3 %  |

**Supplementary table 3.** Gene expression in patients with and without diabetes (tumor and no tumor combined).

|                           | Patients without diabetes |        | Patients with diabetes |        | p     |
|---------------------------|---------------------------|--------|------------------------|--------|-------|
|                           | mean                      | SD     | mean                   | SD     |       |
| <i>AR</i>                 | 0.612                     | 0.327  | 0.722                  | 0.887  | 0.672 |
| <i>KLK3</i>               | 11.355                    | 8.756  | 13.243                 | 10.337 | 0.563 |
| <i>FOLH1</i>              | 0.045                     | 0.058  | 0.086                  | 0.110  | 0.429 |
| <i>MKI67</i>              | 0.015                     | 0.012  | 0.019                  | 0.022  | 0.103 |
| <i>Cyp27A1</i>            | 0.131                     | 0.109  | 0.086                  | 0.059  | 0.098 |
| <i>Cyp7B1</i>             | 0.164                     | 0.076  | 0.139                  | 0.059  | 0.323 |
| <i>IR-A / IR-B ratio</i>  | 1.671                     | 0.895  | 1.693                  | 0.759  | 0.657 |
| <i>IR-B / IGF1R ratio</i> | 0.065                     | 0.033  | 0.059                  | 0.034  | 0.089 |
| <i>ESR2</i>               | 0.0017                    | 0.0017 | 0.0016                 | 0.0014 | 0.972 |

Measurements were performed in duplicates. RNA content was normalized for the housekeeping gene *Ubiquitin C (UBC)* using the  $\Delta\Delta C_t$  method. Statistical comparisons were performed by multiple linear regression analyses of log-transformed values, adjusting for age and BMI.
